# Supplementary material for: mTOR-mediated cancer drug resistance suppresses autophagy and generates a druggable metabolic vulnerability
Source: PubMed Central journal article supplement (PMC7499183; doi:10.1038/s41467-020-18504-7), 2020-09-17
Supplement: 41467_2020_18504_MOESM1_ESM.pdf [file 41467_2020_18504_MOESM1_ESM.pdf]

# **mTOR-mediated cancer drug resistance suppresses autophagy and generates a druggable metabolic vulnerability**

Gremke et al.

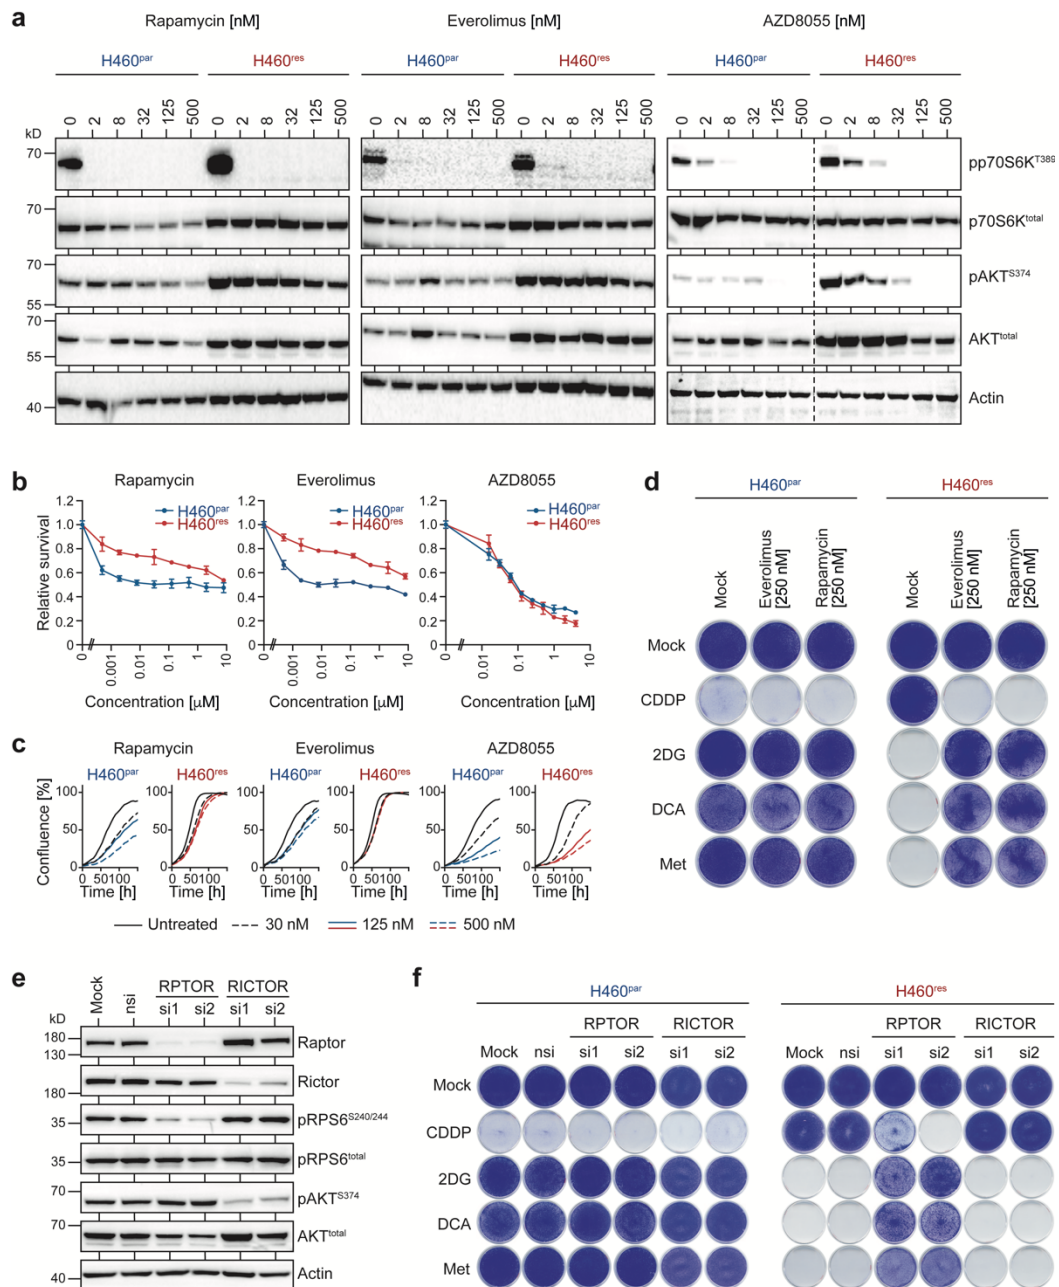

**Supplementary Fig. 1. Metabolic vulnerability of CDDP-resistant H460 cells is mediated by mTORC1. a-b,** Western blot (a) and cell titer assay (b) of H460<sup>par</sup> and H460<sup>res</sup> cells treated for 3 days with indicated concentrations of the mTORC1-selective inhibitors Rapamycin and Everolimus or the dual mTOR kinase inhibitor AZD8055. Shown are mean  $\pm$  SD (n=3). **c,** Culture confluence determined by automated real-time live-cell imaging of H460<sup>par</sup> and H460<sup>res</sup> cells treated as in (a-b). **d,** Clonogenic growth of H460<sup>par</sup> and H460<sup>res</sup> cells treated with CDDP, 2DG, DCA and Metformin (Met). mTORC1 was inhibited with Rapamycin (250 nM) and Everolimus (250 nM) as indicated. **e,** Western blot of H460<sup>par</sup> and H460<sup>res</sup> cells 3 days following transfection with indicated siRNAs against RPTOR (Raptor) or RICTOR. **f,** Clonogenic growth of H460<sup>par</sup> and H460<sup>res</sup> cells transfected with indicated siRNAs 2 days before treatment with CDDP, 2DG, DCA and Met.

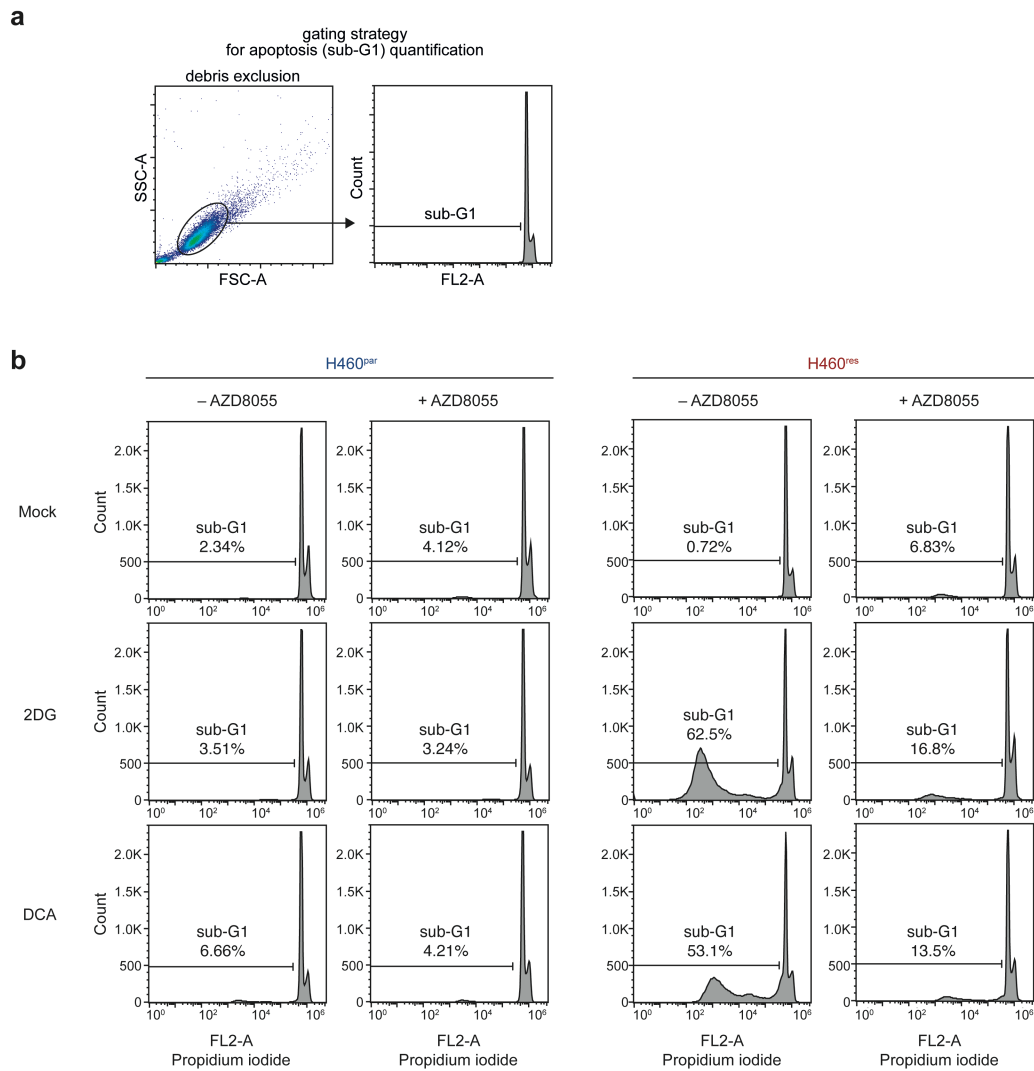

**Supplementary Fig. 2. mTOR inhibition rescues CDDP-resistant H460<sup>res</sup> cells from apoptosis induced by metabolic drug treatment.** H460<sup>par</sup> and H460<sup>res</sup> cells were treated with the 2DG/DCA  $\pm$  AZD8055 for 5 days and analyzed for apoptosis (sub-G1) by flow cytometry. **a**, Gating strategy. **b**, Representative flow cytometry histograms. The full analysis results are shown in Fig. 2e.

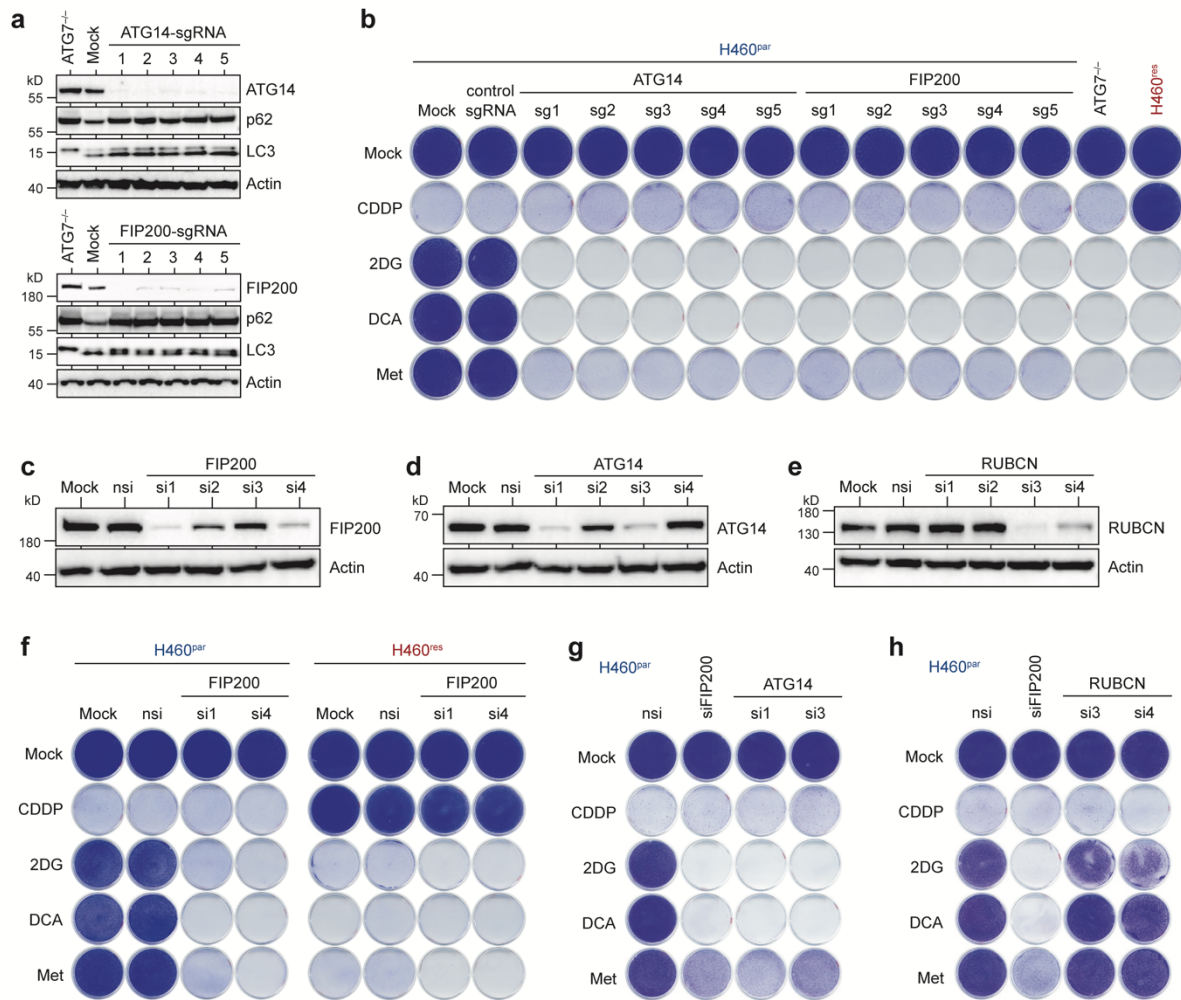

**Supplementary Fig. 3. Specific inhibition of autophagy induces metabolic vulnerability.** **a-b**, *H460<sup>par</sup>* cells were transfected with pX459 plasmid expressing distinct CRISPR-Cas9 nucleases targeting ATG14 or FIP200. Transfected cells were selected with puromycin and examined for target gene knockout by Western blot (**a**). **b**, Clonogenic growth of knockout cells in the presence of indicated drugs. A non-targeting control nuclease was used as negative control. Positive controls were *H460* ATG7<sup>-/-</sup> and *H460<sup>res</sup>* cells. **c-h**, *H460<sup>par</sup>* and *H460<sup>res</sup>* cells were transfected with siRNAs targeting FIP200, ATG14 and RUBCN and examined for target gene knockdown by Western blot (**c-e**). **f-g**, Cells with successful knockdown were analyzed for clonogenic growth in the presence of the indicated drugs.

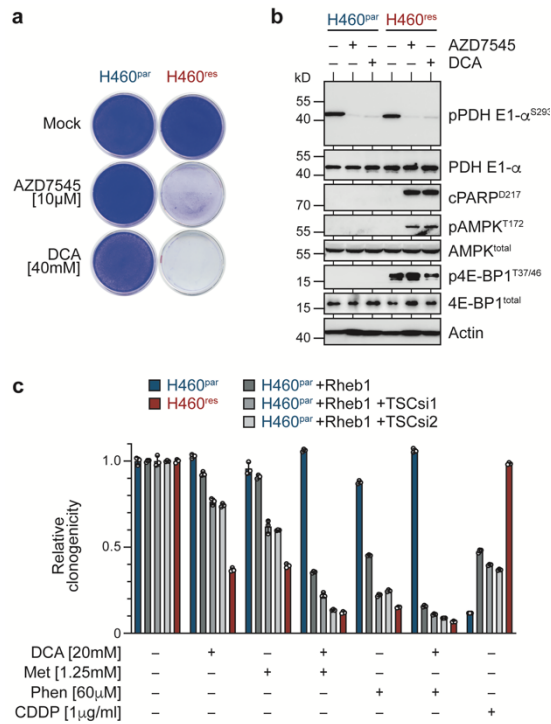

**Supplementary Fig. 4. mTOR-mediated metabolic vulnerability extends to other metabolic inhibitors.** **a**, Clonogenic growth of H460<sup>par</sup> and H460<sup>res</sup> cells treated with pyruvate dehydrogenase kinase inhibitors AZD7545 or DCA for 6 days. **b**, Western blot of cells H460<sup>par</sup> and H460<sup>res</sup> treated with AZD7545 or DCA for 48 hours. **c**, H460<sup>par</sup> cells stably expressing Flag-Rheb1 were transfected with two different sets of siRNAs targeting TSC. Shown is a quantification of the clonogenic growth following treatment with indicated doses of DCA, Met, Phen and CDDP. H460<sup>par</sup> and H460<sup>res</sup> were included as control. Relative clonogenicity is shown as mean  $\pm$  SD, n=3.

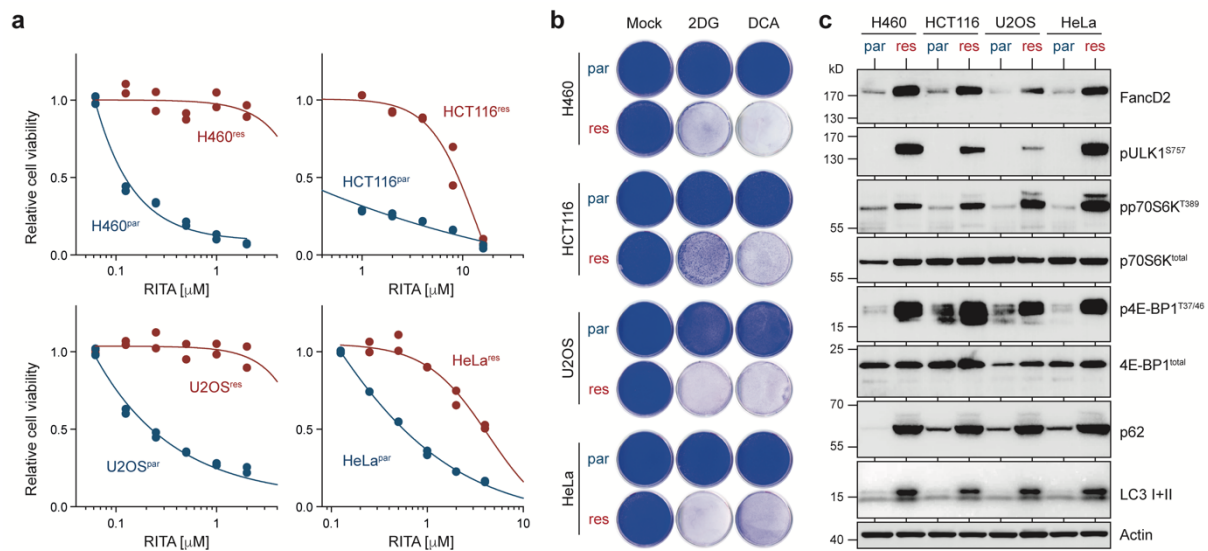

**Supplementary Fig. 5. Metabolic vulnerability of RITA-resistant tumor cells.** H460 lung, HCT116 colorectal, U2OS osteosarcoma and HeLa cervical cancer cells were cultured in the presence of RITA yielding RITA-resistant (res) cell lines. **a**, Cell viability following 3 day treatment with indicated RITA concentrations. Shown are individual replicates, n=2. **b**, Clonogenic growth under treatment with 2DG or DCA. H460: 20 mM 2DG, 30 mM DCA; HCT116; 15 mM 2DG, 30 mM DCA; U2OS: 20 mM 2-DG, 35 mM DCA; HeLa: 12.5 mM 2DG, and 20 mM DCA. **c**, Western blot for FancD2, mTOR and autophagy markers.

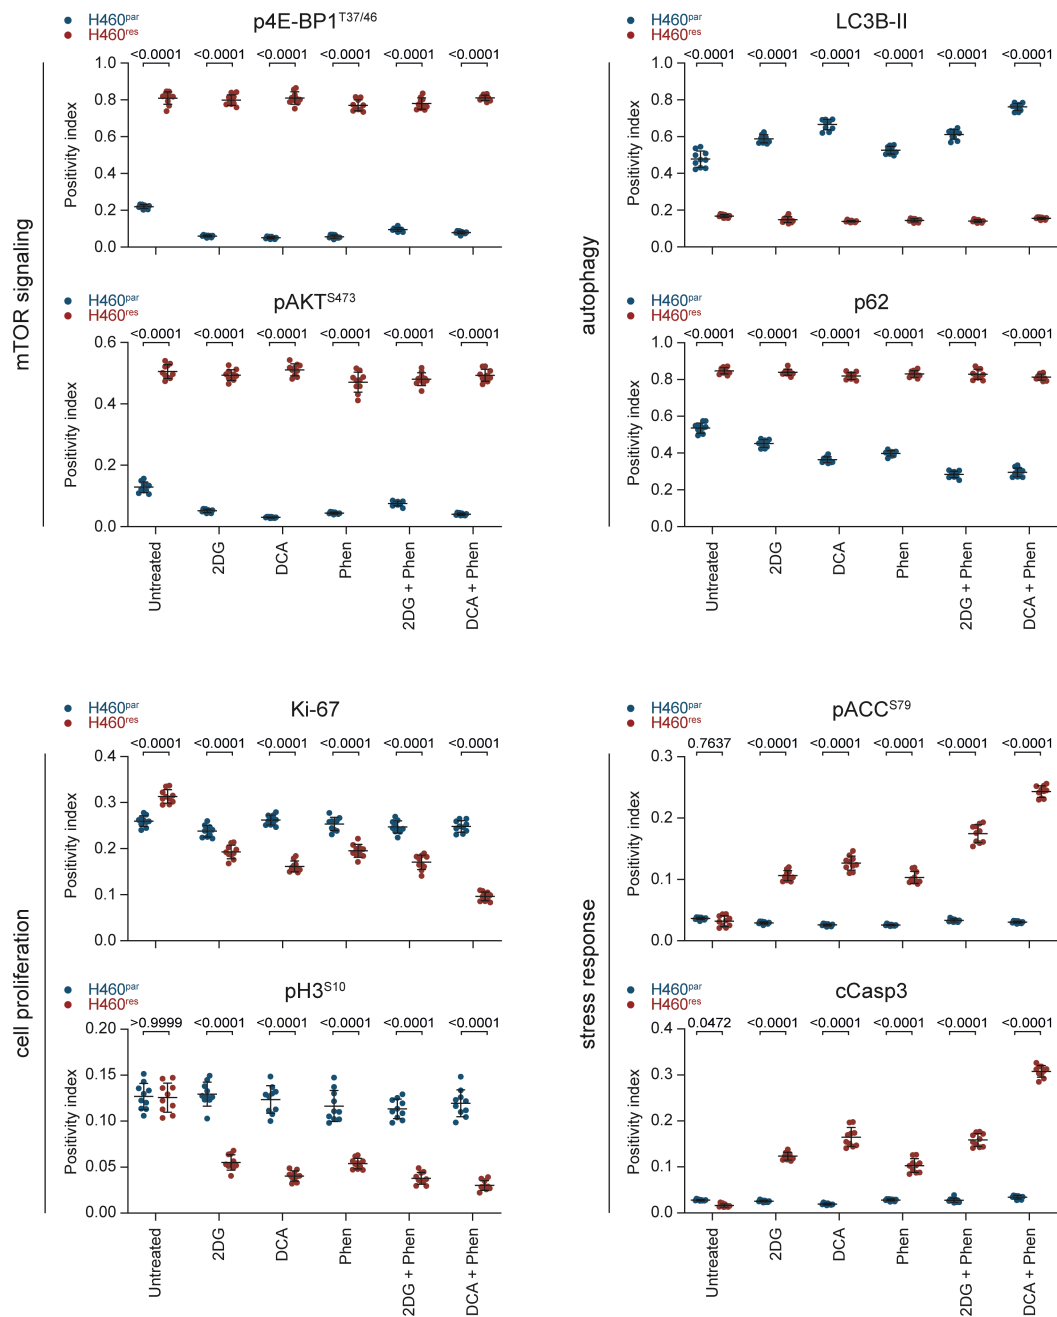

**Supplementary Fig. 6. Differential effects of metabolic inhibitors on H460<sup>par</sup> and H460<sup>res</sup> tumors in mice.** H460<sup>par</sup> and H460<sup>res</sup> mouse tumors treated with the indicated drugs for 3 days were examined by immunohistochemistry. Immunostaining was analyzed quantitatively by automated image analysis. Shown is the positivity index (mean  $\pm$  SD, n=10 lung tumors per treatment). Differences between H460<sup>par</sup> and H460<sup>res</sup> mouse tumors were tested for statistical significance by two-way ANOVA and Sidak's multiple comparisons test. Representative images are shown in Fig. 7c.
